# Supplementary material for: Sensor-Controlled Digital Game for Heart Failure Self-management: Protocol for a Randomized Controlled Trial
Source: PubMed Central journal article supplement (PMC10209796; doi:10.2196/45801), 2023-05-10
Supplement: resprot_v12i1e45801_app1.pdf [file resprot_v12i1e45801_app1.pdf]

SUMMARY STATEMENT

PROGRAM CONTACT:  
ERIN ITURRIAGA  
301-435-0403  
iturriae@mail.nih.gov

( Privileged Communication )

Release Date: 06/23/2021  
Revised Date:

Application Number: 1 R01 HL160692-01

Principal Investigator

RADHAKRISHNAN, KAVITA

Applicant Organization: UNIVERSITY OF TEXAS, AUSTIN

Review Group: BMHO  
Biobehavioral Medicine and Health Outcomes Study Section

Meeting Date: 06/07/2021 RFA/PA: PA18-722  
Council: OCT 2021 PCC: HHATMN  
Requested Start: 09/01/2021

Dual IC(s): NR, EB

Project Title: Sensor-controlled digital game for heart failure self-management behavior adherence: A randomized controlled trial

SRG Action: Impact Score:35 Percentile:24

Next Steps: Visit [https://grants.nih.gov/grants/next\\_steps.htm](https://grants.nih.gov/grants/next_steps.htm)

Human Subjects: 48-At time of award, restrictions will apply

Animal Subjects: 10-No live vertebrate animals involved for competing appl.

Gender: 1A-Both genders, scientifically acceptable

Minority: 1A-Minorities and non-minorities, scientifically acceptable

Age: 3A-No children included, scientifically acceptable

| Project Year | Direct Costs Requested | Estimated Total Cost |
|--------------|------------------------|----------------------|
| 1            | 415,447                | 639,208              |
| 2            | 479,889                | 738,358              |
| 3            | 482,293                | 742,057              |
| 4            | 432,195                | 664,976              |
| <b>TOTAL</b> | <b>1,809,824</b>       | <b>2,784,599</b>     |

ADMINISTRATIVE BUDGET NOTE: The budget shown is the requested budget and has not been adjusted to reflect any recommendations made by reviewers. If an award is planned, the costs will be calculated by Institute grants management staff based on the recommendations outlined below in the COMMITTEE BUDGET RECOMMENDATIONS section.

EARLY STAGE INVESTIGATOR  
NEW INVESTIGATOR

RADHAKRISHNAN, K

**1R01HL160692-01 Radhakrishnan, Kavita****COMMITTEE BUDGET RECOMMENDATIONS  
EARLY STAGE INVESTIGATOR  
NEW INVESTIGATOR  
PROTECTION OF HUMAN SUBJECTS UNACCEPTABLE**

**RESUME AND SUMMARY OF DISCUSSION:** This application proposes a two-armed randomized controlled trial (RCT) to refine and test efficacy of a smartphone sensor-controlled digital games (SCDGs) intervention to improve self-management of behaviors including weight monitoring (WM) and physical activity (PA) among adults with heart failure (HF). During discussion, the panel agreed the significance of a remote, scalable intervention to improve self-management behaviors in HF patients is high, with potential to address geographical and racial health disparities in HF outcomes, reduce rehospitalizations and increase quality of life. Reviewers noted the use of a remote platform with SCDG that includes integrated real-time sensor monitored health behaviors to promote adherence to self-management behaviors by this promising new investigator and her strong investigative team is innovative. Additional strengths include pilot data supporting feasibility and acceptability of SCDGs by older adults, a recruitment plan targeting states with highest prevalence of and health disparities in HF and a rigorous design with an active control group, appropriate measures and qualitative assessment of participant perspectives to improve the intervention. The panel identified several weaknesses including underdeveloped rationale for WM and details of PA analyses, generalizability limitations due to use of a recruitment company and the ecological momentary analysis approach was not well-articulated. Overall, the panel agreed the application's strengths outweighed its weaknesses and will have a moderately high impact on addressing geographical and health disparities, as well as reduce rehospitalizations in heart failure patients.

**DESCRIPTION (provided by applicant):** Heart failure (HF) is a growing pandemic; in the U.S., the number of those diagnosed with HF is expected to rise to 8 million with annual costs at \$69 billion by 2030. Despite effective interventions to reduce HF morbidity and mortality, vulnerable populations with HF suffer disproportionately from hospitalization and mortality especially in the southern U.S. states. Self-management (SM) behavioral interventions to improve HF outcomes are therefore imperative. Remote interventions to promote SM behaviors present an important strategy to address the widening geographical and racial health disparities in HF outcomes. One promising approach is the use of sensor-controlled digital games (SCDGs), which offer affordable, portable, scalable tools to facilitate engagement in HF SM behaviors that show the poorest adherence (weight monitoring and physical activity) while being enjoyable and easy to use. The primary goal of this study is to evaluate the efficacy of a SCDG intervention that integrates HF participants' behavioral data from weight scale and activity tracker sensors to activate game progress, rewards, and feedback. For Aim 1, we will refine an SCDG that we have already developed for mobile smartphones to be playable for longer durations for sustained behavior adherence to weight-monitoring and physical activity. For Aim 2, using a randomized controlled clinical trial, we will compare the SCDG intervention versus a sensor-only intervention for the primary outcome of rate of engagement in the HF SM behavior of weight-monitoring and the secondary outcomes of physical activity behavior engagement, HF SM knowledge, self-efficacy, HF functional status, hospitalization, and quality of life at baseline and at 6, 12, and 24 weeks. For our sample, we will recruit adults aged 45 years or older from 7 southern U.S. states and hospitalized with HF within the past 6 months. We will randomize 200 participants to either the SCDG intervention group, in which participants will receive sensors that track weight monitoring and activity and will play the SCDG on a mobile smartphone, or a control group that will receive sensors, an app that tracks activity and weight monitoring, and standardized written HF educational materials. For Aim 3, we will conduct a mixed-methods assessment to discern facilitators and barriers impacting

RADHAKRISHNAN, K

participants' engagement with the sensor-based interventions for HF SM behavior adherence. For Aim 4, based on daily HF SM weight-monitoring and physical activity behavior data and ecological momentary assessments of symptoms, mood, satisfaction, and cognitive status, we will conduct digital phenotyping of HF SM weight- monitoring and physical activity behaviors. This project will generate insight and guidance for scalable and easy-to-use digital gaming solutions to motivate persistent adherence to HF SM behaviors and improve health outcomes among individuals with HF.

**PUBLIC HEALTH RELEVANCE:** Individuals diagnosed with heart failure (HF) in the southern U.S. face significant disparities in hospitalization and mortality rates, but effective HF self-management behaviors can reduce their healthcare burden and suffering. We propose a randomized controlled trial of a sensor-controlled digital game intervention in 7 southern U.S. states, to improve HF individuals' knowledge, skills, and motivation to engage in the important HF self-management behaviors of weight monitoring and physical activity. This project will generate insight and guidance regarding the use of digital gaming as an affordable, portable, scalable technology to improve HF self-management behaviors and potentially reduce the burden of HF.

## CRITIQUE 1

Significance: 3

Investigator(s): 3

Innovation: 2

Approach: 4

Environment: 2

**Overall Impact:** This study addresses an important topic in that HF is a major contributor to hospitalizations, adverse prognosis, and health care costs. There is poor adherence to HF self-management behaviors that can improve outcomes, and an ongoing need for scalable interventions that work. The investigator team, led by a promising ESI, is strong, with a track-record of collaborating on a pilot feasibility study, and complementary expertise. There are several innovative aspects, most notably, designing a sensor-controlled digital game (SCDG) for predominantly older adults with HF is an innovative application of digital game design. The integration of real-time sensor monitored health behaviors allows for monitoring and feedback, potentially powerful behavior change technique and will also allow for predictive modeling of health behaviors – though this latter goal is less novel. There are several strengths of the approach, including the use of a randomized design to test the efficacy of the intervention; enrollment from 7 US southern states with the highest prevalence of HF; pilot data demonstrating at least some enthusiasm and acceptability of DGs in older adults with HF as well as ability to recruit patients remotely with decent engagement in the SCDG and end-of-study qualitative assessments. Enthusiasm was diminished for several reasons. It was not clear why weight monitoring (WM) was selected as the primary outcome given less clear linkage of WM with improved prognosis compared to other behaviors. Few details were provided as to how physical activity (PA) analyses will be conducted, including whether they will assess intensity of activity versus step counts, alone. The statistical power for the PA analyses was not described. WM is only helpful if linked with adherence and titration of diuretic medications and low salt diet – yet intervening on these behaviors is described as a future direction. The recruitment approach through a clinical trial recruitment company may limit the understanding of the generalizability of the intervention. Feasibility of EMA assessments for Aim 4 was unclear as EMA was not included in the pilot study, and there was little mention of statistical power for this Aim. The environment was satisfactory for the proposed research. Overall, this study was expected to have moderate potential for impact, driven primarily by its thoughtful design, innovation, and potential

RADHAKRISHNAN, K

to more broadly inform the understanding of the potential for gaming interventions to impact adherence in older adults with chronic disease, while tempered by its incremental approach, with the trial focused on weight monitoring and PA rather than the full set of behaviors relevant to HF outcomes.

### **1. Significance:**

#### **Strengths**

- HF is a substantial contributor to adverse health outcomes and costs
- There is a need for scalable, potent interventions that improve HF self-management behaviors including PA and weight monitoring.
- Digital phenotyping HF behaviors, while exploratory, may inform design of sensor-controlled behavioral interventions

#### **Weaknesses**

- No major weaknesses

### **2. Investigator(s):**

#### **Strengths**

- Led by an ESI with background in engineering and nursing, conducted R21 funded pilot feasibility trial
- Well supported by experts in computer science, gaming design, mobile health sensors, biostatistics

#### **Weaknesses**

- Unclear extent of experience on team in game design for older adults and in conduct of behavioral RCTs
- HF specialists have small role on team as consultants
- Unclear expertise in actigraphy assessment of physical activity

### **3. Innovation:**

#### **Strengths**

- Applying SCDG to older adults with HF is innovative; has potential to broadly inform the utility of this approach for older adults, at least in terms of engagement

#### **Weaknesses**

- Physical activity monitoring focused on step counts – does not measure sedentary behavior or exercise intensity or sleep as could be measured with actigraphy

### **4. Approach:**

#### **Strengths**

- Builds on pilot data from feasibility trial which demonstrated decent engagement with prototype for the SCDG
- Uses a rigorous randomized design to study efficacy

RADHAKRISHNAN, K

- Enrolls patients remotely across 7 states with high prevalence of HF
- Includes rigorous qualitative assessment of participants perspectives on the intervention at end of study which should inform subsequent intervention development and readiness for implementation
- Explicitly considers sex as a biological variable even stratifying randomization by sex

#### **Weaknesses**

- Approach does not target medication and dietary adherence which are key to HF outcomes, and is not integrated with care pathways, likely influencing potency
- Few details on how PA will be calculated, nor on statistical analyses involving PA
- The Withings Move activity tracker can calculate intensity of exercise and sleep, but only step counts are mentioned in the approach
- Relies on patient self-report to identify potential HF hospitalizations; few details on how hospitalizations will be adjudicated
- Functionality of Withings apps for control group not clearly described – there are some sensor-controlled gaming aspects of these apps making it a little challenging to understand the key difference between intervention and control groups.

#### **5. Environment:**

##### **Strengths**

- Access to computer sense and clinical trial infrastructure through institution

##### **Weaknesses**

- No major weaknesses

#### **Study Timeline:**

##### **Strengths**

- Clearly described and realistic milestones

##### **Weaknesses**

- No major weaknesses

#### **Protections for Human Subjects:**

Acceptable Risks and/or Adequate Protections

Data and Safety Monitoring Plan (Applicable for Clinical Trials Only):

Acceptable

#### **Inclusion Plans:**

- Sex/Gender: Distribution justified scientifically
- Race/Ethnicity: Distribution justified scientifically
- Inclusion/Exclusion Based on Age: Distribution justified scientifically

RADHAKRISHNAN, K

- Enrollment expected to have substantial diversity including 20% AA and 10% Hispanic, 50% women

**Vertebrate Animals:**

Not Applicable (No Vertebrate Animals)

**Biohazards:**

Not Applicable (No Biohazards)

**Resource Sharing Plans:**

Acceptable

**Budget and Period of Support:**

Recommend as Requested

**CRITIQUE 2**

Significance: 4

Investigator(s): 4

Innovation: 3

Approach: 5

Environment: 2

**Overall Impact:** This is a proposal to utilize a rigorous RCT design to test an innovative self-care and gamification app against an active control group (that receives all but the 'app'), with the primary outcome being an essential component of heart failure (HF) self-care. The aim to recruit previously hospitalized HF patients from underserved parts of the US (e.g., high risk for re-hospitalization) using a completely remote research platform, contribute to the significance of the undertaking because of the potential disseminability. This is a strong research team that together has accomplished the R21 work that informs the proposal, though overall, the experience managing an R01 based RCT of this size resides in consultant Baranowski, and involvement of cardiologist consultants does not inform the undertaking. This work demonstrates scientific rigor, premise, and feasibility. Scientific rigor is also demonstrated in the approach to measurement, which relies on well-validated instruments. The use of an active control group provides an additional element - e.g., if both groups reach/improve to a clinically meaningful level of daily weighing, then it will indicate that the larger platform may not be necessary, though the proposed secondary analyses (e.g., those associated with SA 3 & 4) will help identify which patients would benefit sufficiently from each approach. While enthusiasm is high, some elements are not fully described. It appears that some degree of EMA will be incorporated to identify factors associated with adherence/use of the app vs. non-adherence/not using the app, and this component is unclear. The pilot data provided describe percent change, and 1) group differences are not apparent, and 2) achievement of threshold adherence linked to outcomes - e.g., 80% daily weighing, increase of 2,000 steps per day up to 10,000 daily steps, is not described. In addition, how physical activity goals will be established is not clear. The environment is strong.

RADHAKRISHNAN, K

## 1. Significance:

### Strengths

- Focus on (non) adherence in heart failure (HF) among patients with prior HF hospitalization is significance, as this is a group at risk for repeat hospitalization and health decline.
- Targeting daily weighing as primary outcome as a proximal factor that presages decompensation
- Testing a 'gamification' platform with 'app' and both weight and physical activity sensors enhances disseminability, should the intervention have demonstrated efficacy over the control condition.
- Use of a remote platform for all research activities, which allows for recruitment over a wide swath of the US having underrepresentation of healthcare and poorer HF related outcomes.
- Even if there are no group differences at follow-up, but both groups show improved adherence, there will be an approach to disseminate.

### Weaknesses

- Key preliminary data that support rigor and premise are not sufficiently informative - e.g., they applicant describes an increase in weighing and physical activity, but for weight, this is not 'tagged' to the 80% threshold powered to in the current application, and the increase of 623 steps per day is only 31% of the 2000 that is associated with meaningful outcomes.

## 2. Investigator(s):

### Strengths

- This is a very strong team that brings expertise in all elements of this moderately complex undertaking
- The team has collaborated previously in accomplishing the work that informs the current application.

### Weaknesses

- Aside from consultant Baranowski, this would be the first NIH funded R01 of an RCT, which as described is a considerable undertaking
- There are 3 consultant cardiologists who provide apparent overlapping expertise. Furthermore, the importance of this expertise for the proposed RCT is not fully apparent, as the PI has experience in HF care and the patients will all be recruited and engaged remotely - e.g., these cardiologists likely are not involved in the care of these patients.

## 3. Innovation:

### Strengths

- Integration of real time data with a gamification 'app' to promote adherence to key HF self-management behaviors.
- Utilization of EMA to ascertain intra-personal experiences associated with adherence/use of the 'app' with non-adherence/not using the 'app'
- Breath of data to be collected, including variables associated with adherence/app use and non/adherence/non app use provide for personalization through phenotyping

RADHAKRISHNAN, K

- Use of a remote platform for all research activities, which allows for recruitment over a wide swath of the US having underrepresentation of healthcare and poorer HF related outcomes.

#### **Weaknesses**

- Dissemination of new technologies that monitor a more proximal index of 'fluid load' that leads to weight gain - e.g., implanted pulmonary artery pressure monitors, may make the issue of daily weighing less important.
- Behaviors that contribute to weight gain in HF - e.g., dietary and medication non-adherence, might provide better targets.

#### **4. Approach:**

##### **Strengths**

- Use of highly rigorous RCT design
- Measures to be used are all validated with this population, thus demonstrating scientific rigor.
- Prior work supports scientific premise and feasibility, including ability to recruit, ability to deliver the intervention and control conditions, and high satisfaction/uptake of the platform.
- Use of a remote platform for all research activities, which allows for recruitment over a wide swath of the US having underrepresentation of healthcare and poorer HF related outcomes.
- Combined SA 3 and SA 4 should provide for greater personalization and implementation testing
- Use of an active control arm a potential strength - e.g., it may not be necessary to utilize the whole gamification element to achieve clinically meaningful level of adherence to HF self-care, though here too, apparent secondary analyses - e.g., those associated with SA 4 - can help identify those patients for whom this extra element are required to achieve sufficient self-management.

##### **Weaknesses**

- EMA platform/questions are not fully described. It is not apparent whether this will be incorporated into the 'app' or will be a distinct platform. Impression is that this is underdeveloped
- Data from the pilot study mostly describe percent increase (e.g., in adherence), rather than the more informative baseline and follow-up values, or the percent in each group that met some threshold (e.g., 80% adherence to daily weight monitoring, average 2,000 step increase in PA per day).
- Pilot data (Figure 3) don't appear to show real group differences.
- Increasing dissemination of more proximal indices of weight gain - e.g., pulmonary artery pressure monitoring - may make focus on daily weighing less relevant in the near term.
- The description of a key game element is helping the avatar avoid hospitalization. Given that this is a relatively high-risk group (e.g., prior HF hospitalization), this outcome could happen despite high adherence to PA and daily weighing, setting up a disconnect between being a good game player and a real-world outcome.
- Previously, updates to hardware/software became an implementation problem. Given reliance on commercial products, this might be a continued problem of interface with the 'app'.
- The manner by which initial goals for PA - or for increases over the weeks of participation - will be set, are not apparent.



RADHAKRISHNAN, K

## **5. Environment:**

### **Strengths**

- UT Austin, including the Advanced Computer Center and School of Engineering - provides a very strong research environment

### **Weaknesses**

- None noted

## **Study Timeline:**

### **Strengths**

- A detailed graphic timeline with appropriate milestones is provided

### **Weaknesses**

- It is not clear how much time will be needed to refine the SCDG intervention. 6-months is designated in the timeline, but the Research Plan describes a 12-month period.

## **Protections for Human Subjects:**

### **Unacceptable Risks and/or Inadequate Protections**

- The applicant describes risks associated with potential loss of confidentiality and protections against this risk. Yet, the establishment of PA at initiation of trial participation, and of activity goals moving forward, and the potential risks associated, are not discussed.
- Furthermore, it is possible that an adherent patient who uses the app daily could still have a HF hospitalization, 'setting up a disconnect' between what the 'app' (working through the avatar) is promoting, and the lived experience.

### **Data and Safety Monitoring Plan (Applicable for Clinical Trials Only):**

#### **Acceptable**

- Applicant describes formation of a DSMB, and appropriately frequent monitoring of adverse events.

## **Inclusion Plans:**

- Sex/Gender: Distribution justified scientifically
- Race/Ethnicity: Distribution justified scientifically
- Inclusion/Exclusion Based on Age: Distribution justified scientifically
- Plan is to recruit equal numbers of men and women, 66% White. No upper age limit to participation. Age > 45 is appropriate, given the nature of the population - previously hospitalized HF.

## **Vertebrate Animals:**

Not Applicable (No Vertebrate Animals)

## **Biohazards:**

RADHAKRISHNAN, K

Not Applicable (No Biohazards)

### **Resource Sharing Plans:**

Acceptable

### **Budget and Period of Support:**

Budget Modifications Recommended (in amount/time)

Recommended budget modifications or possible overlap identified:

- The need to involve the multiple cardiologist consultants who each provide the same expertise is not apparent, given the experience in HF that the PI brings, and the fact that all patients will be recruited and involved remotely

### **CRITIQUE 3**

Significance: 1

Investigator(s): 1

Innovation: 1

Approach: 2

Environment: 1

**Overall Impact:** HF is a morbid disease and the overall morbidity and mortality continue to increase, despite having many advanced interventions and therapies. Remote interventions to promote self-management (SM) behaviors present an important strategy to address the widening geographical and racial health disparities in HF outcomes. The team proposes that sensor-controlled digital games (SCDGs), is an affordable, portable, scalable tool to facilitate engagement in HF SM behaviors. Aim 1 will refine the SCDG, Aim 2 will be a RCT comparing SCDG vs sensor-only intervention, Aim 3 will be a mixed-methods assessment to discern facilitators and barriers impacting participant engagement, and Aim 4 will phenotype HF SM weight-monitoring and physical activity. I am very enthusiastic about this proposal. The proposal addresses a clinically significant problem in a very innovative way by using the SCDG. Data demonstrate feasibility, and rigor is demonstrated in the methods and approach. The team has great synergy and have an established history of collaborative grants and publications. UT Austin is a supportive academic environment with plenty of resources available to support the team.

#### **1. Significance:**

##### **Strengths**

- HF is a growing pandemic; in the U.S., the number of those diagnosed with HF is expected to rise to 8 million with annual costs at \$69 billion by 2030.
- HF is the most common diagnosis among hospitalized patients aged 65 years or older, with a 50% death rate within 5 years following diagnosis
- SM interventions to improve HF outcomes are imperative, because the inability to self-manage HF results in frequent hospitalizations and poor QoL

##### **Weaknesses**

- None

RADHAKRISHNAN, K

## 2. Investigator(s):

### Strengths

- PI has a background in engineering and informatics, ESI with a history of NIH-funding (R21).
- R21 led by PI led to the development of a sensor-controlled digital game (to be used in the current R01)
- Excellent team with a history of collaboration:
  - Mobile computing for real-time behavior data aggregation from sensors (Christine Julien)
  - Real-time behavior data analysis using machine learning techniques (Edison Thomaz),
  - Digital gaming for behavior change (Tom Baranowski and Matthew O'Hair),
  - Delivery of community-based interventions to diverse racial groups (Miyong Kim)
  - History of previous funding and publications
  - Experienced statistician (Rathouz) with previous experience in patient behaviors
  - HF cardiologists/consultants from 3 different systems

### Weaknesses

- None

## 3. Innovation:

### Strengths

- The SCDG intervention will provide contextually relevant feedback and game incentives to motivate behavioral changes in HF SM,
- The SCDG intervention will collect data on participants' responses to the feedback to inform decision-making
- In the feasibility RCT study, the team demonstrated remote implementation of a smartphone-based intervention using a DG and sensors among participants in 18 counties which included rural areas that were 100 miles away from the closest city in Texas and Oklahoma.

### Weaknesses

- None

## 4. Approach:

### Strengths

- Key preliminary data: randomized feasibility trial of SCDG intervention showed 46% increase in weighing 5 days or more in a week from baseline to 12 weeks and 23% increase in physical activity steps from 7th to 12th week as compared to the sensor-only control group.
- Feasibility study demonstrated ~90% acceptability of SCDG
- Rigor has been demonstrated by citing key data supporting SCDG, using a RCT design (computer automated), appropriate blinding of key personnel, and detailed methodological approach.

RADHAKRISHNAN, K

- Multiple team members participated in the SCDG feasibility 2-group RCT, and they have an established collaboration that developed the application programming interface required for the app.
- Key refinement modifications will be implemented, include synchronizing of data and improved cognitive assessments
- Statistical plan is rigorous and detailed

#### **Weaknesses**

- Preliminary data were not statistically significant with respect to the WM changes in the SCDG group

#### **5. Environment:**

##### **Strengths**

- UT Austin is an excellent research University/academic environment
- Excellent research and SON. Plenty of resources and support available to investigators including the Biomedical Data Science Hub and Center for Transdisciplinary Collaborative Research in the SON

##### **Weaknesses**

- None

#### **Study Timeline:**

##### **Strengths**

- Incredibly detailed, easy to follow, and appears to be feasible

##### **Weaknesses**

- None

#### **Protections for Human Subjects:**

Acceptable Risks and/or Adequate Protections

- No concerns

Data and Safety Monitoring Plan (Applicable for Clinical Trials Only):

Acceptable

- Minimal risk

#### **Inclusion Plans:**

- Sex/Gender: Distribution justified scientifically
- Race/Ethnicity: Distribution justified scientifically
- Inclusion/Exclusion Based on Age: Distribution justified scientifically
- Age of 45 is used, and evidence shows that lifetime risk for HF is highest for those >45 years of age

RADHAKRISHNAN, K

**Vertebrate Animals:**

Not Applicable (No Vertebrate Animals)

**Biohazards:**

Not Applicable (No Biohazards)

**Resource Sharing Plans:**

Not Applicable (No Relevant Resources)

**Budget and Period of Support:**

Recommend as Requested

**THE FOLLOWING SECTIONS WERE PREPARED BY THE SCIENTIFIC REVIEW OFFICER TO SUMMARIZE THE OUTCOME OF DISCUSSIONS OF THE REVIEW COMMITTEE, OR REVIEWERS' WRITTEN CRITIQUES, ON THE FOLLOWING ISSUES:**

**PROTECTION OF HUMAN SUBJECTS: UNACCEPTABLE**

During the discussion the panel agreed that any physical activity involved with the intervention increases potential risk and since no plan for addressing such risk is included in the application, the protection of human subjects is unacceptable.

**INCLUSION OF WOMEN PLAN: ACCEPTABLE****INCLUSION OF MINORITIES PLAN: ACCEPTABLE****INCLUSION ACROSS THE LIFESPAN: ACCEPTABLE**

**COMMITTEE BUDGET RECOMMENDATIONS:** The panel agreed that the need for multiple cardiologist consultants, given the PI's expertise, was not warranted.

---

Footnotes for 1 R01 HL160692-01; PI Name: Radhakrishnan, Kavita

NIH has modified its policy regarding the receipt of resubmissions (amended applications). See Guide Notice NOT-OD-18-197 at <https://grants.nih.gov/grants/guide/notice-files/NOT-OD-18-197.html>. The impact/priority score is calculated after discussion of an application by averaging the overall scores (1-9) given by all voting reviewers on the committee and multiplying by 10. The criterion scores are submitted prior to the meeting by the individual reviewers assigned to an application, and are not discussed specifically at the review meeting or calculated into the overall impact score. Some applications also receive a percentile ranking. For details on the review process, see [http://grants.nih.gov/grants/peer\\_review\\_process.htm#scoring](http://grants.nih.gov/grants/peer_review_process.htm#scoring).



## MEETING ROSTER

### Biobehavioral Medicine and Health Outcomes Study Section Risk, Prevention and Health Behavior Integrated Review Group CENTER FOR SCIENTIFIC REVIEW

BMHO

06/07/2021 - 06/08/2021

**Notice of NIH Policy to All Applicants:** Meeting rosters are provided for information purposes only. Applicant investigators and institutional officials must not communicate directly with study section members about an application before or after the review. Failure to observe this policy will create a serious breach of integrity in the peer review process, and may lead to actions outlined in NOT-OD-14-073 at <https://grants.nih.gov/grants/guide/notice-files/NOT-OD-14-073.html> and NOT-OD-15-106 at <https://grants.nih.gov/grants/guide/notice-files/NOT-OD-15-106.html>, including removal of the application from immediate review.

#### **CHAIRPERSON(S)**

FILLINGIM, ROGER B, PHD  
DISTINGUISHED PROFESSOR  
DEPARTMENT OF COMMUNITY DENTISTRY  
AND BEHAVIORAL SCIENCE  
COLLEGE OF DENTISTRY  
UNIVERSITY OF FLORIDA  
GAINESVILLE, FL 32610

CHAYTOR, NAOMI S, PHD \*  
ASSOCIATE PROFESSOR  
DEPARTMENT OF MEDICAL EDUCATION  
AND CLINICAL SCIENCES  
ELSON S. FLOYD COLLEGE OF MEDICINE  
WASHINGTON STATE UNIVERSITY  
SPOKANE, WA 99202

#### **MEMBERS**

BENJAMIN- NEELON, SARA E, PHD  
PROFESSOR  
DEPARTMENT OF HEALTH  
BEHAVIOR AND SOCIETY  
JOHNS HOPKINS SCHOOL OF PUBLIC HEALTH  
BALTIMORE, MD 21205

COLLOCA, LUANA, PHD \*  
ASSOCIATE PROFESSOR  
DEPARTMENT OF PAIN TRANSLATIONAL SYMPTOM  
SCIENCE  
SCHOOL OF NURSING  
UNIVERSITY OF MARYLAND  
BALTIMORE, MD 21201

BRUEHL, STEPHEN, PHD  
PROFESSOR  
DEPARTMENT OF ANESTHESIOLOGY  
VANDERBILT UNIVERSITY MEDICAL CENTER  
NASHVILLE, TN 37212

D'ALONZO, KAREN T, PHD \*  
ASSOCIATE PROFESSOR  
DIVISION OF NURSING SCIENCE  
SCHOOL OF NURSING  
RUTGERS BIOMEDICAL AND HEALTH SCIENCES  
RUTGERS, THE STATE UNIVERSITY OF NEW JERSEY  
NEWARK, NJ 07102

BUCK, HARLEAH G, PHD \*  
PROFESSOR  
COLLEGE OF NURSING  
UNIVERSITY OF IOWA  
IOWA CITY, IA 52242

DUNNE, EUGENE M, PHD \*  
ASSISTANT PROFESSOR  
DEPARTMENT OF ORAL HEALTH SCIENCES  
TEMPLE UNIVERSITY  
PHILADELPHIA, PA 19140

BURG, MATTHEW M, PHD  
PROFESSOR  
DEPARTMENT OF INTERNAL MEDICINE  
YALE UNIVERSITY SCHOOL OF MEDICINE  
NEW HAVEN, CT 06520

FORTIER, MICHELLE, PHD  
ASSOCIATE PROFESSOR  
SUE AND BILL GROSS SCHOOL OF NURSING  
UNIVERSITY OF CALIFORNIA, IRVINE  
ORANGE, CA 92868

GALLO, LINDA C, PHD \*  
PROFESSOR  
DEPARTMENT OF PSYCHOLOGY  
SAN DIEGO STATE UNIVERSITY  
SAN DIEGO, CA 92123

GOLDMAN, MYLA D, MD \*  
PROFESSOR AND VICE CHAIR  
DEPARTMENT OF NEUROLOGY  
SCHOOL OF MEDICINE  
VIRGINIA COMMONWEALTH UNIVERSITY  
RICHMOND, VA 23298

HARPER, FELICITY, PHD  
ASSOCIATE PROFESSOR  
DEPARTMENT OF ONCOLOGY  
KARMANOS CANCER INSTITUTE  
WAYNE STATE UNIVERSITY  
DETROIT, MI 48201

HASSETT, AFTON L, PSYD  
ASSOCIATE PROFESSOR  
DEPARTMENT OF ANESTHESIOLOGY  
CHRONIC PAIN AND FATIGUE RESEARCH CENTER  
UNIVERSITY OF MICHIGAN MEDICAL SCHOOL  
ANN ARBOR, MI 48106

KRONISH, IAN M, MD  
ASSOCIATE PROFESSOR  
DEPARTMENT OF MEDICINE  
COLUMBIA UNIVERSITY MEDICAL CENTER  
NEW YORK, NY 10032

MATHEW, JOSEPH P, MD  
PROFESSOR  
DEPARTMENT OF ANESTHESIOLOGY  
DUKE UNIVERSITY MEDICAL CENTER  
DURHAM, NC 27710

MEYER, JACOB D, PHD \*  
ASSISTANT PROFESSOR  
DEPARTMENT OF KINESIOLOGY  
COLLEGE OF HUMAN SCIENCES  
IOWA STATE UNIVERSITY  
AMES, IA 50011

NAPADOW, VITALY, PHD \*  
ASSOCIATE PROFESSOR  
MARTINOS CENTER FOR BIOMEDICAL IMAGING  
MASSACHUSETTS GENERAL HOSPITAL  
HARVARD MEDICAL SCHOOL  
CHARLESTOWN, MA 02129

PYATAK, ELIZABETH F, PHD \*  
ASSOCIATE PROFESSOR  
DEPARTMENT OF OCCUPATIONAL SCIENCE  
AND OCCUPATIONAL THERAPY  
HEALTH SCIENCE CAMPUS  
UNIVERSITY OF SOUTHERN CALIFORNIA  
LOS ANGELES, CA 90089

RHEE, KYUNG E, MD  
PROFESSOR  
DEPARTMENT OF PEDIATRICS  
UNIVERSITY OF CALIFORNIA, SAN DIEGO  
LA JOLLA, CA 92093

RINI, CHRISTINE, PHD  
PROFESSOR  
DEPARTMENT OF MEDICAL SOCIAL SCIENCES  
FEINBERG SCHOOL OF MEDICINE  
NORTHWESTERN UNIVERSITY  
CHICAGO, IL 60611

ROPER, JENEVIEVE L, PHD \*  
ASSISTANT PROFESSOR  
DEPARTMENT OF HEALTH AND HUMAN SCIENCES  
COLLEGE OF SCIENCE AND ENGINEERING  
LOYOLA MARYMOUNT UNIVERSITY  
LOS ANGELES, CA 90045

SALWEN-DEREMER, JESSICA K, PHD \*  
ASSISTANT PROFESSOR  
PSYCHIATRY AND MEDICINE  
GEISEL SCHOOL OF MEDICINE  
DARTMOUTH COLLEGE  
HANOVER, NH 03755

SCHEMBRE, SUSAN, PHD \*  
ASSOCIATE PROFESSOR  
DEPARTMENT OF FAMILY AND COMMUNITY MEDICINE  
COLLEGE OF MEDICINE TUCSON  
THE UNIVERSITY OF ARIZONA HEALTH SCIENCES  
TUCSON, AZ 85714

SCHENKER, YAEL, MD \*  
PROFESSOR OF MEDICINE  
SECTION OF PALLIATIVE CARE AND MEDICAL ETHICS  
DIVISION OF GENERAL INTERNAL MEDICINE  
UNIVERSITY OF PITTSBURGH  
PITTSBURGH, PA 15261

SCIAMANNA, CHRISTOPHER N, MD, MPH \*  
PROFESSOR OF MEDICINE AND PUBLIC HEALTH SERVICES  
DIVISION OF GENERAL INTERNAL MEDICINE  
MILTON S HERSHEY COLLEGE OF MEDICINE  
PENNSYLVANIA STATE UNIVERSITY  
HERSHEY, PA 17033

SEN, SOUVIK, MD, MPH \*  
PROFESSOR AND CENTER FOR ECONOMIC EXCELLENCE  
STROKE CHAIR  
DEPARTMENT OF NEUROLOGY  
UNIVERSITY OF SOUTH CAROLINA  
COLUMBIA, SC 29203

SMITH, PATRICK J, PHD  
ASSOCIATE PROFESSOR  
DEPARTMENT OF PSYCHIATRY AND BEHAVIORAL  
SCIENCES  
MEDICINE AND POPULATION HEALTH SCIENCES  
DUKE UNIVERSITY  
DURHAM, NC 27710



SMITH, SAKIMA A, MD \*  
ASSOCIATE PROFESSOR  
DIVISION OF CARDIOVASCULAR MEDICINE  
DEPARTMENT OF INTERNAL MEDICINE  
WEXNER MEDICAL CENTER  
THE OHIO STATE UNIVERSITY  
COLUMBUS, OH 43210

TEMPLE, JENNIFER L, PHD  
PROFESSOR  
DEPARTMENTS OF EXERCISE AND NUTRITION SCIENCES  
AND COMMUNITY HEALTH AND HEALTH BEHAVIOR  
SCHOOL OF PUBLIC HEALTH AND HEALTH PROFESSIONS  
UNIVERSITY AT BUFFALO  
BUFFALO, NY 14214

UEBELACKER, LISA A, PHD  
PROFESSOR  
DEPARTMENT OF PSYCHIATRY AND HUMAN BEHAVIOR  
BUTLER HOSPITAL  
BROWN UNIVERSITY  
PROVIDENCE, RI 02906

VAN CLEAVE, JANET H, PHD \*  
ASSISTANT PROFESSOR  
RORY MEYERS COLLEGE OF NURSING  
NEW YORK UNIVERSITY  
NEW YORK, NY 10010

VOLLMER, TIMOTHY LEE, MD \*  
PROFESSOR  
DEPARTMENT OF NEUROLOGY  
ROCKY MOUNTAIN MS CLINIC ANSCHUTZ MEDICAL CENTER  
SCHOOL OF MEDICINE  
UNIVERSITY OF COLORADO DENVER  
AURORA, CO 80045

WEN, KUANG-YI, PHD \*  
ASSOCIATE PROFESSOR  
SIDNEY KIMMEL CANCER CENTER  
THOMAS JEFFERSON UNIVERSITY  
PHILADELPHIA, PA 19107

**MAIL REVIEWER(S)**

PALESH, OXANA G, PHD  
ASSOCIATE PROFESSOR  
DEPARTMENT OF PSYCHIATRY AND BEHAVIORAL  
SCIENCES  
STANFORD UNIVERSITY SCHOOL OF MEDICINE  
STANFORD, CA 94305

**SCIENTIFIC REVIEW OFFICER**

VOSVICK, MARK A, PHD  
SCIENTIFIC REVIEW OFFICER  
CENTER FOR SCIENTIFIC REVIEW  
NATIONAL INSTITUTES OF HEALTH  
BETHESDA, MD 20892

**EXTRAMURAL SUPPORT ASSISTANT**

WATTS, MELISSA D  
EXTRAMURAL SUPPORT ASSISTANT  
CENTER FOR SCIENTIFIC REVIEW  
NATIONAL INSTITUTE FOR HEALTH  
BETHESDA, MD 20892

\* Temporary Member. For grant applications, temporary members may participate in the entire meeting or may review only selected applications as needed.

Consultants are required to absent themselves from the room during the review of any application if their presence would constitute or appear to constitute a conflict of interest.
